# Supplementary material for: Structure and polymorphism of the 10.10.10 Simmons and Park cryptand
Source: Royal Society of Chemistry journal article supplement (doi:10.1039/b008044f), 2001-01-01
Supplement: b008044f.doc [file b008044f.doc]

Compound **1d** was prepared as described2 and colorless crystals were obtained by evaporation from light petroleum. Single-crystal X-ray diffraction experiments were carried out with a SMART 1K CCD area detector mounted on a 3-circle diffractometer, using graphite-monochromated Mo-Kα radiation (*λ* = 0.71073 Å) and SMART software.17 The temperature of the experiments was controlled using an Oxford Cryosystems Cryostream open-flow N2 gas cryostat.18 The temperature measurement was calibrated against the phase transition in KH2PO4 at 122.5 K,19 the possible error not exceeding 2 K. Full data collections were performed at 210 K (α-**1d**) and 150 K (β-**1d**). In both cases, over a hemisphere of reciprocal space was nominally covered by four sets of *ω* scans (each scan 0.3° in *ω*), each set with different *φ* and/or 2*θ* angles. Reflection intensities were integrated using SAINT17 and corrected for Lorentz and polarization factors, absorption being negligible (*μ* = 0.6 cm–1). The structures were solved by direct methods20 and refined by full-matrix least squares against *F*2 of all reflections using SHELXTL.21 C and N atoms were refined with anisotropic displacement parameters. H atoms were treated as ‘riding’ (α-**1**) or refined isotropically (β-**1d**). Crystal data and experimental parameters are listed in Table 1.

17 SMART and SAINT, Release 4.05, Area detector control and integration software. Bruker AXS, Analytical X-Ray Instruments, Madison, WI, 1995.

18 J. Cosier and A. M. Glazer, *J. Appl. Crystallogr.*, 1986, **19**, 105.

19 R. J. Nelmes, G. M. Meyer and J. E. Tiballis, *J. Phys. C*, 1982, **15**, 59.

20 G. M. Sheldrick, *Acta Crystallogr., Sect. A*, 1990, **46**, 467.

21 G. M. Sheldrick, SHELXTL, Version 5/VMS, Bruker AXS, Analytical X-Ray Instruments, Madison, WI, 1995.
