# Supplementary material for: Structure and polymorphism of the 10.10.10 Simmons and Park cryptand
Source: Royal Society of Chemistry journal article supplement (doi:10.1039/b008044f), 2001-01-01
Supplement: b008044f1.pdf [file b008044f1.pdf]

## SUPPLEMENTARY INFORMATION

The orientation matrices of the monoclinic  $\alpha$ -**1d** and triclinic  $\beta$ -**1d** are

| $\alpha$ - <b>1d</b>      | $\beta$ - <b>1d</b>      |
|---------------------------|--------------------------|
| -0.04498 0.03470 -0.05025 | 0.09575 0.00268 0.00270  |
| 0.01226 0.04616 0.04715   | 0.01456 0.04294 -0.08065 |
| 0.05998 0.01658 -0.02612  | -0.04025 0.08283 0.00623 |

The phase transformation is described by matrices

| $\alpha$ - <b>1d</b> | $\beta$ - <b>1d</b> | $\alpha$ - <b>1d</b> | $\beta$ - <b>1d</b> |   |    |
|----------------------|---------------------|----------------------|---------------------|---|----|
| -1/2                 | 1/2                 | -1/2                 | -1                  | 1 | 0  |
| 1/2                  | 1/2                 | -1/2                 | 1                   | 1 | -1 |
| 0                    | 0                   | -1                   | 0                   | 0 | -1 |

which give the calculated orientation matrices

| for $\alpha$ - <b>1d</b>  | for $\beta$ - <b>1d</b>  |
|---------------------------|--------------------------|
| -0.04654 0.04922 -0.05192 | 0.07965 -0.01028 0.01556 |
| 0.01419 0.02876 0.05189   | 0.03390 0.05844 -0.09332 |
| 0.06154 0.02129 -0.02752  | -0.04340 0.07656 0.00953 |

(note that the crystal tilted on its mount during the phase transition; this may in part account for the discrepancy between the calculated and measured orientation matrices)

The  $\beta$ -**1d** unit cell calculated from the transformation matrix is

$a=11.924$ ,  $b=13.598$ ,  $c=13.936$ ,  $\alpha=51.28$ ,  $\beta=62.88$ ,  $\gamma=63.57$ ;

cf. the measured one of

$a=10.209$ ,  $b=12.334$ ,  $c=13.904$ ,  $\alpha=63.78$ ,  $\beta=74.73$ ,  $\gamma=70.54$
