# Supplementary figures and images for: Structure and polymorphism of the 10.10.10 Simmons and Park cryptand
Source: Royal Society of Chemistry journal article supplement (doi:10.1039/b008044f), 2001-01-01

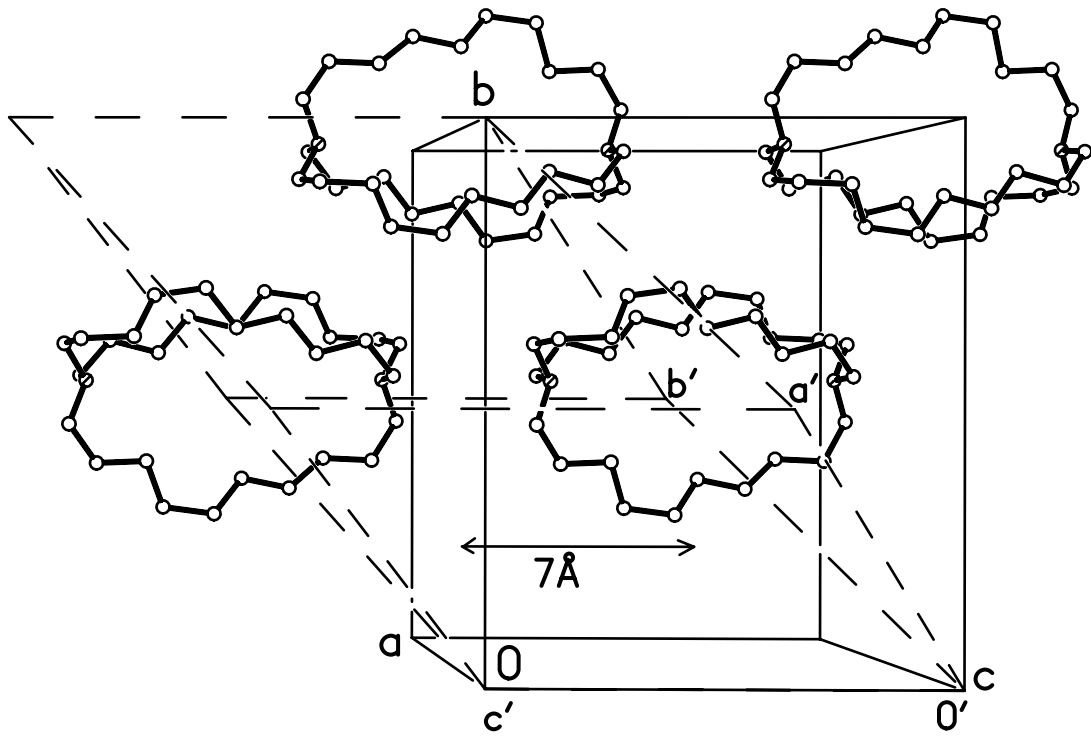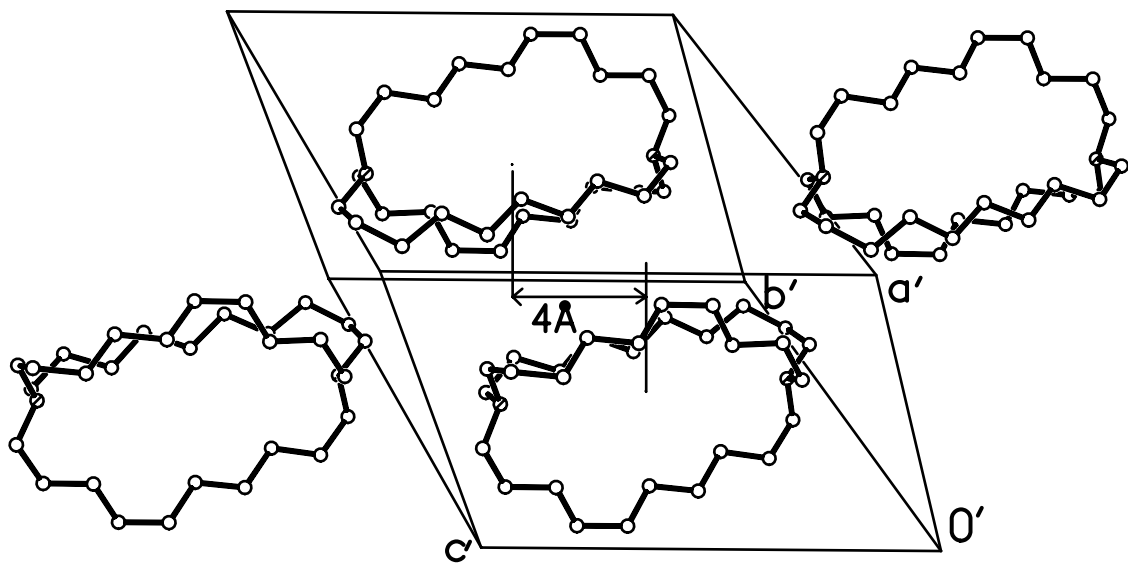

Supplement: b008044f2.pdf [file b008044f2.pdf]
